# Supplementary material for: Attempts of Physical Refining of Sterol-Rich Sunflower Press Oil to Obtain Minimally Processed Edible Oil
Source: MDPI journal article supplement (doi:10.3390/foods10081901), 2021-08-16
Supplement: s1 [file s1]

**Table S1.**-Elemental analysis (mg kg<sup>-1</sup>) (n=2) and chlorophyll content (mg kg<sup>-1</sup>) (n=2) of the press and solvent oils obtained in 2017 after different bleaching treatments that were not effective.

|              | Press CON   |             | Press CAM   |             | Press STIG  |             |             |             | Solvent STIG |             |             |             |
|--------------|-------------|-------------|-------------|-------------|-------------|-------------|-------------|-------------|--------------|-------------|-------------|-------------|
|              | Initial     | TR1         | Initial     | TR1         | Initial     | TR1         | TR2         | TR3         | Initial      | TR4         | TR5         | TR6         |
| <b>P</b>     | <b>27.3</b> | <b>24.2</b> | <b>15.4</b> | <b>10.7</b> | <b>36.4</b> | <b>30.1</b> | <b>28.9</b> | <b>24.4</b> | <b>585.1</b> | <b>62.6</b> | <b>39.2</b> | <b>47.1</b> |
| As           | nd          | nd          | nd          | nd          | nd          | nd          | 0.1         | nd          | nd           | nd          | 0.1         | nd          |
| Ca           | 78.5        | 21.2        | 58.6        | 35.6        | 106.9       | 39.9        | 27.5        | 49.2        | 305.4        | 95.5        | 31.1        | 40.7        |
| Cu           | 1.1         | 0.1         | 0.2         | 0.3         | 1.1         | 0.2         | 0.6         | 0.2         | 1.1          | 0.4         | 0.1         | 0.2         |
| Fe           | 6.0         | 1.3         | 4.6         | 1.6         | 5.8         | 1.4         | 0.9         | 1.8         | 32.0         | 10.7        | 3.9         | 4.0         |
| K            | 6.7         | 3.8         | 7.3         | 1.7         | 6.4         | 5.2         | 3.9         | 2.4         | 95.4         | 6.1         | 3.6         | 3.4         |
| Mg           | 11.6        | 12.2        | 6.3         | 7.5         | 14.4        | 13.0        | 11.8        | 11.3        | 158.2        | 19.8        | 12.7        | 15.1        |
| Na           | 4.0         | 3.6         | 2.9         | 4.2         | 6.1         | 5.6         | 3.6         | 4.9         | 9.2          | 14.1        | 13.2        | 13.9        |
| Pb           | nd          | nd          | 0.2         | nd          | 0.4         | nd          | nd          | 0.1         | 0.4          | 0.4         | 0.3         | 0.1         |
| S            | 13.0        | 12.2        | 6.6         | 12.3        | 14.3        | 11.8        | 11.3        | 14.2        | 15.0         | 7.3         | 14.8        | 14.8        |
| Zn           | 1.0         | 0.5         | 0.6         | 0.6         | 1.5         | 2.6         | 0.5         | 0.8         | 4.6          | 1.9         | 0.8         | 0.8         |
| Chlorophylls | 2.7         | 1.0         | 1.5         | 1.1         | 6.9         | 3.1         | 2.5         | 1.4         | 21.2         | 1.6         | 1.6         | 1.8         |

nd, not detected. Coefficient of variation  $\leq 7\%$ . See Table 1 for the bleaching agents used.

**Table S2.-**Elemental analysis (mg kg<sup>-1</sup>) (n=2) of the press oils obtained in 2015 after bleaching treatment with Trisyl 0.1 % and Tonsil 278 FF 1.0% (TR1).

|    | CON     |       | CAM     |       | STIG    |       |
|----|---------|-------|---------|-------|---------|-------|
|    | Initial | Final | Initial | Final | Initial | Final |
| As | 0.9     | 0.5   | 1.0     | nd    | 0.7     | 0.1   |
| Ca | 31.8    | 7.0   | 24.1    | 8.4   | 21.9    | 7.5   |
| Cu | 0.4     | 0.1   | 0.5     | 0.1   | 0.4     | 0.1   |
| Fe | 7.0     | 2.0   | 3.1     | 2.5   | 4.4     | 2.1   |
| K  | 7.6     | 2.6   | 7.2     | 5.1   | 4.8     | 4.9   |
| Mg | 6.7     | 4.6   | 5.8     | 5.1   | 4.6     | 5.4   |
| Na | 3.0     | 22.8  | 7.6     | 7.4   | nd      | 10.8  |
| Pb | nd      | nd    | 0.2     | 0.1   | 0.1     | 0.1   |
| S  | 11.4    | 10.1  | 11.6    | 5.8   | 7.3     | 18.2  |
| Zn | 4.7     | 4.6   | 0.8     | 0.6   | 1.4     | 1.6   |

nd, not detected. Results express the mean value of two determinations (n=2). Coefficient of variation ≤ 7%.
